# Supplementary material for: Association Between Variation in Neuropsychological Development and Trajectory of ADHD Severity in Early Childhood
Source: Atypon-hosted journal article supplement (doi:10.1176/appi.ajp.2012.12101360), 2013-07-30
Supplement: 1205_ds001.pdf [file 1205_ds001.pdf]

CHANGE IN NEUROPSYCHOLOGICAL FUNCTIONING AND ADHD SEVERITY

Supplementary Table S1: Number of children treated with medication at each annual evaluation

| Time point  | Stimulant<br>N | Non<br>Stimulant<br>N | Both<br>N | Stimulant/ non<br>stimulant with<br>other <sup>a</sup><br>N | Total |
|-------------|----------------|-----------------------|-----------|-------------------------------------------------------------|-------|
| Baseline    | 0              | 0                     | 0         | 0                                                           | 0     |
| Follow-up 1 | 8              | 0                     | 0         | 2                                                           | 10    |
| Follow-up 2 | 12             | 3                     | 1         | 5                                                           | 21    |
| Follow-up 3 | 19             | 1                     | 0         | 3                                                           | 23    |
| Follow-up 4 | 16             | 5                     | 5         | 6                                                           | 32    |

<sup>a</sup>Other includes neuroleptics and antidepressants

CHANGE IN NEUROPSYCHOLOGICAL FUNCTIONING AND ADHD SEVERITY

Supplementary Table S2: Association of change in neuropsychological functioning with change in ADHD symptom severity and impairment including IQ, BL Diagnostic status and Medication treatment at Age 8 as covariates

| Fixed Effect                | Coefficient        | SE          | T-ratio      | p-value         |
|-----------------------------|--------------------|-------------|--------------|-----------------|
| <i>Level 1 intercept</i>    |                    |             |              |                 |
| Intercept                   | 8.57               | 4.60        | 1.86         | .06             |
| SES                         | -0.07              | 0.03        | -2.00        | .05             |
| FSIQ                        | -0.09              | 0.05        | -1.93        | .06             |
| <b>Diagostic status</b>     | <b>5.99</b>        | <b>1.27</b> | <b>4.72</b>  | <b>&lt;.001</b> |
| Medication treatment        | 0.94               | 1.51        | 0.62         | .54             |
| <b>Change in NEPSY</b>      | <b>-1.93</b>       | <b>0.48</b> | <b>-4.00</b> | <b>&lt;.001</b> |
| <i>Level 1 linear slope</i> |                    |             |              |                 |
| Intercept                   | 0.08               | 1.27        | 0.06         | .95             |
| SES                         | -.00               | 0.01        | -0.12        | .91             |
| FSIQ                        | .02                | .01         | 1.26         | .21             |
| Diagnostic status           | .14                | .35         | .40          | .69             |
| Medication treatment        | -.52               | .43         | -1.91        | .24             |
| <b>Change in NEPSY</b>      | <b>-0.45</b>       | <b>0.14</b> | <b>-3.21</b> | <b>.002</b>     |
| <hr/>                       |                    |             |              |                 |
| Random Effect               | Variance Component | DF          | Chi-square   | P-value         |
| Level 1 intercept           | 31.42              | 89          | 645.34       | <.001           |
| Level 1 linear slope        | 1.79               | 89          | 226.36       | <.001           |

Note: FSIQ (Full Scale IQ) is measured at BL using the WPPSI-III
